# Supplementary material
Source: publisher figshare collection journal article supplement (https://acs.figshare.com/ndownloader/files/8787844)
Supplement: Supplementary file 1 [file 8787844]

  
data_davidl4m 
  
_audit_creation_method            SHELXL-97 
_chemical_name_systematic 
; 
 ? 
; 
_chemical_name_common             ? 
_chemical_melting_point           ? 
_chemical_formula_moiety          'C17 H19 N O' 
_chemical_formula_sum 	   	  'C17 H19 N O' 
_chemical_formula_weight          253.33 
  
loop_ 
 _atom_type_symbol 
 _atom_type_description 
 _atom_type_scat_dispersion_real 
 _atom_type_scat_dispersion_imag 
 _atom_type_scat_source 
 'C'  'C'   0.0033   0.0016 
 'International Tables Vol C Tables 4.2.6.8 and 6.1.1.4' 
 'H'  'H'   0.0000   0.0000 
 'International Tables Vol C Tables 4.2.6.8 and 6.1.1.4' 
 'N'  'N'   0.0061   0.0033 
 'International Tables Vol C Tables 4.2.6.8 and 6.1.1.4' 
 'O'  'O'   0.0106   0.0060 
 'International Tables Vol C Tables 4.2.6.8 and 6.1.1.4' 
  
_symmetry_cell_setting            Orthorhombic 
_symmetry_space_group_name_H-M    P2(1)2(1)2(1) 
_symmetry_space_group_name_Hall   'P 2ac 2ab'
  
loop_ 
 _symmetry_equiv_pos_as_xyz 
 'x, y, z' 
 '-x+1/2, -y, z+1/2' 
 '-x, y+1/2, -z+1/2' 
 'x+1/2, -y+1/2, -z' 
  
_cell_length_a                    8.082(1) 
_cell_length_b                    12.550(2) 
_cell_length_c                    13.607(2) 
_cell_angle_alpha                 90.00 
_cell_angle_beta                  90.00 
_cell_angle_gamma                 90.00 
_cell_volume                      1380.0(3) 
_cell_formula_units_Z             4 
_cell_measurement_temperature     173(1) 
_cell_measurement_reflns_used     8612 
_cell_measurement_theta_min       2.205 
_cell_measurement_theta_max       27.904 
  
_exptl_crystal_description        Cube 
_exptl_crystal_colour             colorless 
_exptl_crystal_size_max           0.53 
_exptl_crystal_size_mid           0.52 
_exptl_crystal_size_min           0.46 
_exptl_crystal_density_meas       ? 
_exptl_crystal_density_diffrn     1.219 
_exptl_crystal_density_method     'not measured' 
_exptl_crystal_F_000              544 
_exptl_absorpt_coefficient_mu     0.075 
_exptl_absorpt_correction_type    'multi-scan'
_exptl_absorpt_correction_T_min   0.9612 
_exptl_absorpt_correction_T_max   0.9662 
_exptl_absorpt_process_details    'Bruker SADABS V2.05' 
  
_exptl_special_details 
; 
 ? 
; 
  
_diffrn_ambient_temperature       173(1) 
_diffrn_radiation_wavelength      0.71073 
_diffrn_radiation_type            MoK\a 
_diffrn_radiation_source          'fine-focus sealed tube' 
_diffrn_radiation_monochromator   graphite 
_diffrn_measurement_device_type   'CCD area detector' 
_diffrn_measurement_method        'phi and omega scans' 
_diffrn_detector_area_resol_mean  ? 
_diffrn_standards_number          ? 
_diffrn_standards_interval_count  ? 
_diffrn_standards_interval_time   ? 
_diffrn_standards_decay_%         ? 
_diffrn_reflns_number             15422 
_diffrn_reflns_av_R_equivalents   0.0248 
_diffrn_reflns_av_sigmaI/netI     0.0197 
_diffrn_reflns_limit_h_min        -10 
_diffrn_reflns_limit_h_max        10 
_diffrn_reflns_limit_k_min        -16 
_diffrn_reflns_limit_k_max        16 
_diffrn_reflns_limit_l_min        -17 
_diffrn_reflns_limit_l_max        17 
_diffrn_reflns_theta_min          2.21 
_diffrn_reflns_theta_max          28.00 
_reflns_number_total              3288 
_reflns_number_gt                 3166 
_reflns_threshold_expression      >2sigma(I) 
  
_computing_data_collection        'Bruker SMART' 
_computing_cell_refinement        'Bruker SMART' 
_computing_data_reduction         'Bruker SAINT' 
_computing_structure_solution     'SHELXS-97 (Sheldrick, 1990)' 
_computing_structure_refinement   'SHELXL-97 (Sheldrick, 1997)' 
_computing_molecular_graphics     'Bruker SHELXTL' 
_computing_publication_material   'Bruker SHELXTL' 
  
_refine_special_details 
; 
 Refinement of F^2^ against ALL reflections.  The weighted R-factor wR and 
 goodness of fit S are based on F^2^, conventional R-factors R are based 
 on F, with F set to zero for negative F^2^. The threshold expression of 
 F^2^ > 2sigma(F^2^) is used only for calculating R-factors(gt) etc. and is 
 not relevant to the choice of reflections for refinement.  R-factors based 
 on F^2^ are statistically about twice as large as those based on F, and R- 
 factors based on ALL data will be even larger. 
; 
  
_refine_ls_structure_factor_coef  Fsqd 
_refine_ls_matrix_type            full 
_refine_ls_weighting_scheme       calc 
_refine_ls_weighting_details 
 'calc w=1/[\s^2^(Fo^2^)+(0.0575P)^2^+0.2635P] where P=(Fo^2^+2Fc^2^)/3' 
_atom_sites_solution_primary      direct 
_atom_sites_solution_secondary    difmap 
_atom_sites_solution_hydrogens    geom 
_refine_ls_hydrogen_treatment     constr 
_refine_ls_extinction_method      none 
_refine_ls_extinction_coef        ? 
_refine_ls_abs_structure_details 
 'Flack H D (1983), Acta Cryst. A39, 876-881' 
_refine_ls_abs_structure_Flack    -0.2(14) 
_refine_ls_number_reflns          3288 
_refine_ls_number_parameters      173 
_refine_ls_number_restraints      0 
_refine_ls_R_factor_all           0.0420 
_refine_ls_R_factor_gt            0.0404 
_refine_ls_wR_factor_ref          0.1025 
_refine_ls_wR_factor_gt           0.1006 
_refine_ls_goodness_of_fit_ref    1.051 
_refine_ls_restrained_S_all       1.051 
_refine_ls_shift/su_max           0.000 
_refine_ls_shift/su_mean          0.000 
  
loop_ 
 _atom_site_label 
 _atom_site_type_symbol 
 _atom_site_fract_x 
 _atom_site_fract_y 
 _atom_site_fract_z 
 _atom_site_U_iso_or_equiv 
 _atom_site_adp_type 
 _atom_site_occupancy 
 _atom_site_symmetry_multiplicity 
 _atom_site_calc_flag 
 _atom_site_refinement_flags 
 _atom_site_disorder_assembly 
 _atom_site_disorder_group 
C1 C 0.70473(17) 0.90861(10) 0.60057(10) 0.0255(3) Uani 1 1 d . . . 
H1A H 0.6145 0.8745 0.6384 0.031 Uiso 1 1 calc R . . 
H1B H 0.7300 0.8624 0.5435 0.031 Uiso 1 1 calc R . . 
C2 C 0.64633(19) 1.01659(11) 0.56371(10) 0.0306(3) Uani 1 1 d . . . 
H2A H 0.7346 1.0493 0.5233 0.037 Uiso 1 1 calc R . . 
H2B H 0.6255 1.0639 0.6206 0.037 Uiso 1 1 calc R . . 
C3 C 0.4893(2) 1.00755(15) 0.50270(13) 0.0434(4) Uani 1 1 d . . . 
H3A H 0.3985 0.9823 0.5444 0.065 Uiso 1 1 calc R . . 
H3B H 0.5072 0.9570 0.4488 0.065 Uiso 1 1 calc R . . 
H3C H 0.4610 1.0776 0.4756 0.065 Uiso 1 1 calc R . . 
C4 C 1.00706(17) 0.92310(10) 0.60726(10) 0.0274(3) Uani 1 1 d . . . 
H4A H 1.0899 0.9645 0.6448 0.033 Uiso 1 1 calc R . . 
H4B H 0.9865 0.9605 0.5444 0.033 Uiso 1 1 calc R . . 
C5 C 1.0741(2) 0.81293(12) 0.58662(11) 0.0349(3) Uani 1 1 d . . . 
H5A H 0.9914 0.7712 0.5492 0.042 Uiso 1 1 calc R . . 
H5B H 1.1758 0.8184 0.5463 0.042 Uiso 1 1 calc R . . 
C6 C 0.99076(18) 0.76856(10) 0.74838(11) 0.0281(3) Uani 1 1 d . . . 
C7 C 0.86188(16) 0.84333(9) 0.74259(9) 0.0226(2) Uani 1 1 d . . . 
C8 C 0.74291(16) 0.84444(9) 0.81848(10) 0.0250(3) Uani 1 1 d . . . 
C9 C 0.75222(19) 0.77026(11) 0.89455(10) 0.0308(3) Uani 1 1 d . . . 
H9 H 0.6684 0.7688 0.9435 0.037 Uiso 1 1 calc R . . 
C10 C 0.8828(2) 0.69855(11) 0.89945(11) 0.0353(3) Uani 1 1 d . . . 
H10 H 0.8897 0.6496 0.9526 0.042 Uiso 1 1 calc R . . 
C11 C 1.0022(2) 0.69839(11) 0.82735(12) 0.0345(3) Uani 1 1 d . . . 
H11 H 1.0927 0.6503 0.8315 0.041 Uiso 1 1 calc R . . 
C12 C 0.60885(16) 0.92625(10) 0.82121(9) 0.0250(3) Uani 1 1 d . . . 
C13 C 0.64866(17) 1.03457(10) 0.82405(10) 0.0269(3) Uani 1 1 d . . . 
H13 H 0.7614 1.0560 0.8234 0.032 Uiso 1 1 calc R . . 
C14 C 0.5248(2) 1.11107(12) 0.82778(11) 0.0340(3) Uani 1 1 d . . . 
H14 H 0.5530 1.1845 0.8306 0.041 Uiso 1 1 calc R . . 
C15 C 0.3602(2) 1.08054(13) 0.82735(11) 0.0399(4) Uani 1 1 d . . . 
H15 H 0.2753 1.1329 0.8286 0.048 Uiso 1 1 calc R . . 
C16 C 0.31983(19) 0.97378(14) 0.82515(12) 0.0398(3) Uani 1 1 d . . . 
H16 H 0.2069 0.9528 0.8251 0.048 Uiso 1 1 calc R . . 
C17 C 0.44294(17) 0.89670(12) 0.82300(11) 0.0326(3) Uani 1 1 d . . . 
H17 H 0.4138 0.8234 0.8228 0.039 Uiso 1 1 calc R . . 
N1 N 0.85310(13) 0.91691(8) 0.66342(8) 0.0231(2) Uani 1 1 d . . . 
O1 O 1.11094(13) 0.75983(8) 0.67718(9) 0.0368(3) Uani 1 1 d . . . 
  
loop_ 
 _atom_site_aniso_label 
 _atom_site_aniso_U_11 
 _atom_site_aniso_U_22 
 _atom_site_aniso_U_33 
 _atom_site_aniso_U_23 
 _atom_site_aniso_U_13 
 _atom_site_aniso_U_12 
C1 0.0277(6) 0.0247(6) 0.0242(6) -0.0006(5) -0.0016(5) -0.0024(5) 
C2 0.0338(7) 0.0301(7) 0.0277(6) 0.0024(5) -0.0047(6) 0.0025(6) 
C3 0.0366(8) 0.0495(10) 0.0441(9) 0.0014(7) -0.0113(7) 0.0053(8) 
C4 0.0271(6) 0.0241(6) 0.0311(6) -0.0015(5) 0.0035(5) -0.0009(6) 
C5 0.0352(7) 0.0301(7) 0.0393(8) -0.0036(6) 0.0117(6) 0.0046(6) 
C6 0.0290(6) 0.0203(6) 0.0348(6) -0.0026(5) -0.0023(5) 0.0021(5) 
C7 0.0256(6) 0.0170(5) 0.0252(6) -0.0021(5) -0.0025(5) -0.0003(5) 
C8 0.0294(6) 0.0192(5) 0.0264(6) -0.0022(5) -0.0027(5) 0.0012(5) 
C9 0.0414(8) 0.0237(6) 0.0272(6) 0.0012(5) 0.0009(6) 0.0004(6) 
C10 0.0515(9) 0.0227(6) 0.0318(7) 0.0043(5) -0.0072(7) 0.0035(6) 
C11 0.0385(7) 0.0230(6) 0.0419(8) -0.0002(6) -0.0094(7) 0.0078(6) 
C12 0.0289(6) 0.0260(6) 0.0202(6) 0.0000(5) 0.0015(5) 0.0025(5) 
C13 0.0318(6) 0.0242(6) 0.0247(6) 0.0012(5) 0.0015(6) 0.0016(5) 
C14 0.0448(8) 0.0285(6) 0.0287(7) 0.0027(6) 0.0038(6) 0.0097(6) 
C15 0.0392(8) 0.0476(9) 0.0330(7) -0.0001(7) 0.0026(7) 0.0207(7) 
C16 0.0279(7) 0.0581(10) 0.0334(7) -0.0061(7) 0.0017(6) 0.0038(6) 
C17 0.0315(7) 0.0352(7) 0.0312(7) -0.0045(6) 0.0040(6) -0.0027(5) 
N1 0.0241(5) 0.0203(5) 0.0249(5) 0.0004(4) 0.0004(4) 0.0002(4) 
O1 0.0321(5) 0.0299(5) 0.0485(6) 0.0022(5) 0.0065(5) 0.0100(4) 
  
_geom_special_details 
; 
 All esds (except the esd in the dihedral angle between two l.s. planes) 
 are estimated using the full covariance matrix.  The cell esds are taken 
 into account individually in the estimation of esds in distances, angles 
 and torsion angles; correlations between esds in cell parameters are only 
 used when they are defined by crystal symmetry.  An approximate (isotropic) 
 treatment of cell esds is used for estimating esds involving l.s. planes. 
; 
  
loop_ 
 _geom_bond_atom_site_label_1 
 _geom_bond_atom_site_label_2 
 _geom_bond_distance 
 _geom_bond_site_symmetry_2 
 _geom_bond_publ_flag 
C1 N1 1.4764(16) . ? 
C1 C2 1.5201(18) . ? 
C1 H1A 0.9900 . ? 
C1 H1B 0.9900 . ? 
C2 C3 1.521(2) . ? 
C2 H2A 0.9900 . ? 
C2 H2B 0.9900 . ? 
C3 H3A 0.9800 . ? 
C3 H3B 0.9800 . ? 
C3 H3C 0.9800 . ? 
C4 N1 1.4622(17) . ? 
C4 C5 1.5114(19) . ? 
C4 H4A 0.9900 . ? 
C4 H4B 0.9900 . ? 
C5 O1 1.4320(19) . ? 
C5 H5A 0.9900 . ? 
C5 H5B 0.9900 . ? 
C6 O1 1.3762(17) . ? 
C6 C11 1.392(2) . ? 
C6 C7 1.4041(18) . ? 
C7 C8 1.4110(18) . ? 
C7 N1 1.4207(15) . ? 
C8 C9 1.3943(18) . ? 
C8 C12 1.4931(17) . ? 
C9 C10 1.388(2) . ? 
C9 H9 0.9500 . ? 
C10 C11 1.376(2) . ? 
C10 H10 0.9500 . ? 
C11 H11 0.9500 . ? 
C12 C17 1.3913(19) . ? 
C12 C13 1.3975(18) . ? 
C13 C14 1.3881(19) . ? 
C13 H13 0.9500 . ? 
C14 C15 1.384(2) . ? 
C14 H14 0.9500 . ? 
C15 C16 1.379(3) . ? 
C15 H15 0.9500 . ? 
C16 C17 1.388(2) . ? 
C16 H16 0.9500 . ? 
C17 H17 0.9500 . ? 
  
loop_ 
 _geom_angle_atom_site_label_1 
 _geom_angle_atom_site_label_2 
 _geom_angle_atom_site_label_3 
 _geom_angle 
 _geom_angle_site_symmetry_1 
 _geom_angle_site_symmetry_3 
 _geom_angle_publ_flag 
N1 C1 C2 112.35(10) . . ? 
N1 C1 H1A 109.1 . . ? 
C2 C1 H1A 109.1 . . ? 
N1 C1 H1B 109.1 . . ? 
C2 C1 H1B 109.1 . . ? 
H1A C1 H1B 107.9 . . ? 
C1 C2 C3 111.88(12) . . ? 
C1 C2 H2A 109.2 . . ? 
C3 C2 H2A 109.2 . . ? 
C1 C2 H2B 109.2 . . ? 
C3 C2 H2B 109.2 . . ? 
H2A C2 H2B 107.9 . . ? 
C2 C3 H3A 109.5 . . ? 
C2 C3 H3B 109.5 . . ? 
H3A C3 H3B 109.5 . . ? 
C2 C3 H3C 109.5 . . ? 
H3A C3 H3C 109.5 . . ? 
H3B C3 H3C 109.5 . . ? 
N1 C4 C5 110.72(11) . . ? 
N1 C4 H4A 109.5 . . ? 
C5 C4 H4A 109.5 . . ? 
N1 C4 H4B 109.5 . . ? 
C5 C4 H4B 109.5 . . ? 
H4A C4 H4B 108.1 . . ? 
O1 C5 C4 109.90(12) . . ? 
O1 C5 H5A 109.7 . . ? 
C4 C5 H5A 109.7 . . ? 
O1 C5 H5B 109.7 . . ? 
C4 C5 H5B 109.7 . . ? 
H5A C5 H5B 108.2 . . ? 
O1 C6 C11 116.49(12) . . ? 
O1 C6 C7 122.49(12) . . ? 
C11 C6 C7 121.02(13) . . ? 
C6 C7 C8 118.10(12) . . ? 
C6 C7 N1 120.93(12) . . ? 
C8 C7 N1 120.96(11) . . ? 
C9 C8 C7 120.00(12) . . ? 
C9 C8 C12 118.67(12) . . ? 
C7 C8 C12 121.30(11) . . ? 
C10 C9 C8 120.63(13) . . ? 
C10 C9 H9 119.7 . . ? 
C8 C9 H9 119.7 . . ? 
C11 C10 C9 119.98(13) . . ? 
C11 C10 H10 120.0 . . ? 
C9 C10 H10 120.0 . . ? 
C10 C11 C6 120.16(13) . . ? 
C10 C11 H11 119.9 . . ? 
C6 C11 H11 119.9 . . ? 
C17 C12 C13 118.73(12) . . ? 
C17 C12 C8 121.09(12) . . ? 
C13 C12 C8 120.17(12) . . ? 
C14 C13 C12 120.51(13) . . ? 
C14 C13 H13 119.7 . . ? 
C12 C13 H13 119.7 . . ? 
C15 C14 C13 120.10(14) . . ? 
C15 C14 H14 119.9 . . ? 
C13 C14 H14 119.9 . . ? 
C16 C15 C14 119.74(14) . . ? 
C16 C15 H15 120.1 . . ? 
C14 C15 H15 120.1 . . ? 
C15 C16 C17 120.54(15) . . ? 
C15 C16 H16 119.7 . . ? 
C17 C16 H16 119.7 . . ? 
C16 C17 C12 120.36(14) . . ? 
C16 C17 H17 119.8 . . ? 
C12 C17 H17 119.8 . . ? 
C7 N1 C4 112.85(10) . . ? 
C7 N1 C1 115.72(10) . . ? 
C4 N1 C1 113.08(10) . . ? 
C6 O1 C5 114.97(10) . . ? 
  
_diffrn_measured_fraction_theta_max    0.995 
_diffrn_reflns_theta_full              28.00 
_diffrn_measured_fraction_theta_full   0.995 
_refine_diff_density_max    0.222 
_refine_diff_density_min   -0.318 
_refine_diff_density_rms    0.041 
